# **Gamma oscillations in the rat ventral striatum originate in the piriform cortex**

**Authors:** James E. Carmichael<sup>1</sup>, Jimmie M. Gmaz<sup>1</sup>, Matthijs A. A. van der Meer<sup>1\*</sup>

<sup>1</sup>Department of Psychological and Brain Sciences, Dartmouth College, Hanover NH 03755

\*Correspondence should be addressed to MvdM, Department of Psychological and Brain Sciences, Dartmouth College, 3 Maynard St, Hanover, NH 03755. E-mail: [mvdm@dartmouth.edu](mailto:mvdm@dartmouth.edu).

**Number of Figures:** 8

**Number of Tables:** 0

**Total Word Count:** 5631

**Abstract Word Count:** 174

**Introduction Word Count:** 549

**Discussion Word Count:** 1474

**Acknowledgments:** We thank Nancy Gibson, Martin Ryan and Jean Flanagan for animal care, Claire Cheetham for suggesting the naris occlusion technique, Youki Tanaka for reagents, and Min-Ching Kuo and Alyssa Carey for technical assistance. This work was supported by Dartmouth College (Dartmouth Fellowship to JEC, and start-up funds to MvdM) and the Natural Sciences and Engineering Research Council (NSERC) of Canada (Discovery Grant award to MvdM, Canada Graduate Scholarship to JMG).

**Conflict of Interest:** The authors declare no competing financial interests.

## 1 **Abstract**

2 Local field potentials (LFP) recorded from the human and rodent ventral striatum (vStr) exhibit prominent,  
3 behaviorally relevant gamma-band oscillations. These oscillations are related to local spiking activity and  
4 transiently synchronize with anatomically related areas, suggesting a possible role in organizing vStr activity.  
5 However, the origin of vStr gamma is unknown. We recorded vStr gamma oscillations across a 1.4mm<sup>2</sup> grid  
6 spanned by 64 recording electrodes as rats rested and foraged for rewards, revealing a highly consistent power  
7 gradient originating in the adjacent piriform cortex. Phase differences across the vStr were consistently  
8 small ( $<10^\circ$ ) and current source density analysis further confirmed the absence of local sink-source pairs  
9 in the vStr. Reversible occlusions of the ipsilateral (but not contralateral) nostril, known to abolish gamma  
10 oscillations in the piriform cortex, strongly reduced vStr gamma power and the occurrence of transient  
11 gamma-band events. These results imply that local circuitry is not a major contributor to gamma oscillations  
12 in the vStr LFP, and that piriform cortex is an important driver of gamma-band oscillations in the vStr and  
13 associated limbic areas.

## 14 **Significance Statement (120 words)**

15 The ventral striatum is an area of anatomical convergence in circuits underlying motivated behavior, but it  
16 remains unclear how its inputs from different sources interact. One of the major proposals of how neural  
17 circuits may dynamically switch between convergent inputs is through temporal organization reflected in  
18 local field potential (LFP) oscillations. Our results show that in the rat, the mechanisms controlling vStr  
19 gamma oscillations are primarily located in the in the adjacent piriform cortex, rather than vStr itself. This  
20 provides a novel interpretation of previous rodent work on gamma oscillations in the vStr and related circuits,  
21 and an important consideration for future work seeking to use oscillations in these areas as biomarkers in  
22 rodent models of human behavioral and neurological disorders.

## 23 **Introduction**

24 The ventral striatum (vStr) is an anatomically heterogeneous region receiving a convergence of anatomical  
25 connections from structures in the cortico-striatal-thalamic loop, as well as from the hippocampal formation  
26 and amygdala (Pennartz et al., 1994; Haber, 2009; Sesack and Grace, 2010). Prominent local field potential  
27 (LFP) oscillations can be recorded from the rodent and human vStr, spanning a broad range of frequencies  
28 that include delta, theta, beta, multiple gamma bands, and high-frequency oscillations (Berke et al., 2004;  
29 van der Meer et al., 2010; Axmacher et al., 2010; Dürschmid et al., 2013; Hunt et al., 2010) and display  
30 phase-amplitude coupling (humans: Cohen et al. 2009a, rodents: Donnelly et al. 2014; Malhotra et al.  
31 2015). A particularly salient feature of the vStr LFP is the presence of prominent gamma-band oscillations,  
32 which include distinct low-gamma ( $\sim 45\text{-}65$  Hz) and high-gamma ( $\sim 70\text{-}90$  Hz) components.

33 Several studies have found correlations between the occurrence of these low- and high-gamma oscillations  
34 such as reward approach and/or receipt (van der Meer and Redish 2009; Berke 2009, but see Malhotra et al.  
35 2015), reward expectation and prediction errors (Cohen et al., 2009a; Axmacher et al., 2010), drug-related  
36 conditioned place preference (Dejean et al., 2016), and impulsive actions (Donnelly et al., 2014). vStr gamma  
37 oscillations are also affected by manipulations of the dopamine and cannabinoid systems (Berke, 2009;  
38 Lemaire et al., 2012; Morra et al., 2012). Importantly, the spiking of vStr neurons is related to these gamma  
39 oscillations, with putative fast-spiking interneurons (FSIs) displaying a particularly striking pattern: partially  
40 distinct populations appear to phase-lock to low- and high-gamma respectively (Berke, 2004; van der Meer  
41 and Redish, 2009; Dejean et al., 2016). Medium spiny neurons (MSNs), which make up the vast majority of  
42 vStr neurons, tend to show weaker but nonetheless statistically significant phase locking (Kalenscher et al.,  
43 2010; Howe et al., 2011) and ensemble spiking activity can predict which gamma band oscillation is present  
44 in the LFP (Catanese et al., 2016).

45 A conservative interpretation of the above body of work is to view gamma oscillations in the vStr LFP  
46 as a signal containing a certain amount of information about the state of the local network, that is, as a

47 practically useful readout. However, in several brain structures there is evidence that the effectiveness of an  
48 incoming stimulus can depend on the phase of local gamma oscillations (Cardin et al., 2009; Sohal et al.,  
49 2009); although such state-dependence has not yet been shown in the vStr, the findings reviewed so far  
50 suggest the possibility that the mechanisms generating vStr gamma contribute to dynamic gain control, as in  
51 “communication through coherence” proposals (Akam and Kullmann, 2010; Womelsdorf et al., 2014; Fries,  
52 2015). This idea is conceptually attractive given the anatomical convergence of multiple inputs onto the  
53 vStr, which all oscillate (O’Donnell and Grace, 1995; Gruber et al., 2009; Harris and Gordon, 2015); indeed,  
54 gamma oscillations in the vStr LFP are often coherent with gamma-band LFP signals in anatomically related  
55 areas, with prefrontal cortical areas being the best-studied example (rodent: Berke 2009; McCracken and  
56 Grace 2009; Dejean et al. 2013; Catanese et al. 2016, human: Cohen et al. 2009b).

57 For both the “readout” or “gain control mechanism” views of vStr gamma oscillations, it is important to  
58 establish how this signal is generated; a crucial first step is to localize their source(s), which have so far  
59 remained unclear. Some studies emphasize the similarity of vStr gamma oscillations with those recorded  
60 in the adjacent piriform cortex (Berke, 2009) while other studies report local heterogeneities that appear  
61 to be inconsistent with volume conduction (Kalenscher et al., 2010; Morra et al., 2012), or focus on cell-  
62 intrinsic contributions such as gamma-band resonance (Taverna et al., 2007). Resolving this issue would  
63 help determine if local vStr circuitry may implement a “switchboard” through a communication-through-  
64 coherence type mechanism (Fries, 2005; Gruber et al., 2009; Akam and Kullmann, 2010), and to enable  
65 a productive dialog between rodent and human studies in which vStr LFPs have behavioral and clinical  
66 relevance (Sturm et al., 2003; McCracken and Grace, 2009; Dejean et al., 2013).

67 Thus, to determine the origin of gamma oscillations in the local field potential of the rat vStr, we (1) record  
68 from across the vStr using a high density electrode array, and (2) inactivate the piriform cortex using re-  
69 versible naris (nostril) occlusions known to abolish piriform gamma (Zibrowski and Vanderwolf, 1997).

## 70 **Methods**

71 **Overview.** This study consists of two experiments: (1) a “LFP mapping” experiment measuring the distri-  
72 bution of gamma oscillations across the vStr, and (2) a “naris occlusion” experiment testing the effects of  
73 unilateral nostril closures on vStr gamma. Data in the LFP mapping experiment were acquired as rats per-  
74 formed a maze-based foraging task, as well as during off-task resting periods. Since we found no difference  
75 in the properties of gamma oscillations on- and off-task, data for the naris experiment were acquired during  
76 rest only. All procedures were approved by the University of Waterloo Animal Care Committee (AUPP  
77 11-06) and the Dartmouth College IACUC (vand.ma.2).

78 **Subjects and timeline.** Seven Long-Evans male rats (>10 weeks old; >400g) were used in total (four in the  
79 LFP mapping experiment and three in the naris occlusion experiment). For the LFP mapping experiment, rats  
80 were pretrained on a foraging task (4 days of maze habituation), implanted with recording probes (described  
81 in detail below), retrained on the task following recovery (minimum 4 days), and recording data acquired.  
82 The naris experiment included two naïve rats and a final rat that had been previously trained on set-shifting  
83 task used in Gmaz et al. (SfN abstract, 2016; no differences were found across rats). All animals were kept  
84 on a 12hr light/dark cycle with all the experiments performed during the light phase.

85 **Surgery and recording probes.** Rats for the LFP mapping experiment were implanted with 64 channel  
86 silicon probes (A8x8-10mm-200-200-177, NeuroNexus; 50 $\mu$ m thick). Probe recording sites and tetrodes  
87 were gold-plated (Sifco 6355) to impedances between 300-500k $\Omega$  (Nano-Z, White Matter LLC). Probes  
88 were attached to a microdrive and implanted as in Vandecasteele et al. (2012), with the addition of a separate  
89 independently movable stainless steel wire reference electrode (gold-plated to 50k $\Omega$ ) implanted into the  
90 same hemisphere (AP 2.2 mm anterior to bregma, ML 2.0 mm, targeting the corpus callosum overlying  
91 the vStr). The probes contained regularly spaced recording electrodes, spanning 1.4mm<sup>2</sup> and arranged in  
92 a 8x8 grid, and were implanted rotated around the vertical axis with the edges between AP 0.6–2.28, ML  
93 1.4–2.8) (Figure 1C). Rats for the naris occlusion experiment were implanted with a either a custom built

94 4-tetrode multi-site drive, with one tetrode located in the vStr (AP 1.5, ML 2.0), with additional tetrodes in  
95 the orbitofrontal, prelimbic, and cingulate cortices (not analyzed here), or a custom 16-tetrode “hyperdrive”  
96 with all tetrodes in the vStr. Following surgery, probes and tetrodes were moved down over the course of  
97 several days until they reached the target region (DV 6.5–8 mm).

98 **Behavioral task.** The *LFP mapping* rats were trained on a square-shaped elevated track (width 10 cm,  
99 each edge of the square 100cm long) with sucrose reward receptacles placed at each of the four corners.  
100 Nosepoking in the reward receptacles yielded 0.1, 0, 0.1, or 0.2ml of 12% sucrose reward respectively; with  
101 experience (daily 40-minute sessions, preceded and followed by 5-10 minutes of off-task recording on a  
102 terracotta planter filled with towels) animals learn to skip the non-rewarded site. Throughout behavioral  
103 training and recording on the task, rats were food-restricted to >85% of their free-feeding weight to en-  
104 courage foraging behavior. The *naris occlusion* rats had *ad libitum* access to food. Before the start of the  
105 experiments described here, one of the three animals had been previously trained on a behavioral task that  
106 used the same physical setup in the same room (Gmaz et al. SfN abstract, 2016).

107 **Data acquisition and preprocessing.** Wideband signals were acquired for the silicon probe and “hyper-  
108 drive” recordings using RHA2132 v0810 multiplexing headstages (Intan) and a KJE-1001/KJD-1000 am-  
109 plification system (Amplipex), sampled at 20kHz (decimated to 2kHz during analysis) referenced against  
110 a single electrode in the corpus callosum above the vStr. To extract spikes from the continuously sampled  
111 Amplipex data, the data was filtered (600-9000Hz), thresholded and peak-aligned (UltraMegaSort2k, Hill  
112 et al. 2011). Recordings for the naïve multisite 4-tetrode drive rats used a Digital Lynx data acquisition  
113 system with an HS-18mm preamplifier (Neuralynx) with the low pass 0.5-500 Hz subsampled from 32kHz  
114 to 2KHz. Spiking data the voltage was recorded at 32kHz when the voltage exceeded a predefined threshold.  
115 Data for LFP mapping analysis had the DC offset removed and was filtered (1-500Hz, 10th order Butter-  
116 worth, `filtfilt.m`). Putative single neurons were manually sorted using MClust 3.5 (A.D. Redish et al.).  
117 Electrode sites with irregular impedance values (>900k $\Omega$ ), intermittent signals, or known defective sites  
118 (B-stock probes) were excluded from analysis (black pixels in Figures 2-5).

119 **Naris occlusion.** Reversible naris closures (“nose plugs”) were constructed from PE90/100 tubing (In-  
120 tramedic) by tying a human hair and a suture in a double knot, threading it through the side of the tubing,  
121 and gluing it to the inside of the tube such that it protruded a ~8mm beyond the tubing, facilitating subse-  
122 quent removal (Kucharski and Hall, 1987; Cummings et al., 1997). Nose plugs were coated with Vaseline  
123 and inserted (or removed) while the rat was briefly under isoflurane anesthesia ( $\leq 2$  min from the time of  
124 induction). The effectiveness of this procedure in blocking air flow through the occluded nostril was verified  
125 by visual inspection: any remaining airflow tended to move the Vaseline. Daily recording sessions consisted  
126 of four off-task segments: a non-occlusion baseline (“pre”), ipsilateral and contralateral naris occlusions (or-  
127 der counterbalanced across sessions) and another non-occlusion baseline (“post”) separated by 45 minutes  
128 to minimize any effects of the isoflurane anesthesia (Figure 7G).

129 **Session inclusion criteria.** For each *LFP mapping* subject, data from three consecutive daily recording  
130 sessions were analyzed, with the recording probe at the same depth across days. These sessions were chosen  
131 such that the probe had to be at the same depth across sessions, and that either the animal had reached the  
132 performance criterion on the task, and if they did not (2/4 rats) then the final three sessions at a consistent  
133 depth were used. For one LFP mapping subject, only two sessions were included due to a faulty recording  
134 tether. For the naris occlusion experiment, four days of data were recorded and analyzed (two days, followed  
135 by one day of no recording, and two more days).

136 **Data analysis overview.** All analyses were performed using MATLAB 2014a and can be reproduced us-  
137 ing code available on our public GitHub repository (<http://github.com/vandermeerlab/papers>) with data files,  
138 metadata, and code usage guides available upon request. We performed spectral analysis on the LFP data us-  
139 ing power spectral densities (PSDs) over specific epochs within recording sessions (off-task baseline record-  
140 ings before and after behavior; reward site approach (run) and reward site consumption; and rest data only  
141 for the naris occlusion group). Given that gamma oscillations in the vStr LFP tend to occur in distinct events  
142 (Masimore et al., 2005; Cohen et al., 2009b; Donnelly et al., 2014) we also performed event-based analysis  
143 (detailed below).

144 **Gamma event detection and analysis.** Gamma events were detected following the procedure in Catanese  
145 et al. 2016. First, LFP data were filtered into the bands of interest (low-gamma: 45-65 Hz; high-gamma:  
146 70-90 Hz) using a 5<sup>th</sup> order Chebyshev filter (ripple dB 0.5) with a zero-phase digital filter (MATLAB  
147 `filtfilt()`). The instantaneous amplitude was extracted from the filtered signal by Hilbert transform  
148 (MATLAB `abs(hilbert())`). For the LFP mapping experiment, a single recording channel for gamma  
149 event detection was selected by first computing the power spectral density (PSD) for the six most ventrolat-  
150 eral recording sites and using the site with the largest power averaged across frequencies in the low-gamma  
151 range (45-65Hz). Large amplitude artifacts ( $>4$  SDs from the mean in the unfiltered data) and chewing  
152 artifacts ( $>3$ SD of the z-scored data filtered in the 200-500Hz) were first removed from the data. If the  
153 instantaneous amplitude surpassed the 95<sup>th</sup> percentile of the amplitude of the session in it was considered a  
154 candidate event. Events were excluded if they: co-occurred with high voltage spindles ( $>4$ SD in 7-11Hz),  
155 had  $<4$  cycles, or had a variance score (variance/mean of cycle peaks and troughs)  $>1.5$ . Applying a thresh-  
156 old ( $40\mu V$ ) to the minimum filtered amplitude helped remove false positives in the high-gamma band only,  
157 but did not aid in rejecting false positives for low-gamma. script for both the mapping and naris data.

158 For each detected gamma event, a length-matched pseudo-random “control” event was extracted by identify-  
159 ing the period of lowest amplitude in the gamma band of interest within a 20s window prior to each detected  
160 gamma event. Gamma and random events were then converted into one of two formats. For gamma power  
161 analysis, events were converted to the FieldTrip format by taking 100ms of data centered on detected gamma  
162 events (`ft_redefinetrial`, FieldTrip toolbox, Oostenveld et al. 2011). For phase and current source  
163 density (CSD) analysis the events were converted into a three cycle “triplet” by identifying the cycle with the  
164 highest amplitude and extracting it as well as the cycle before and after. The three extracted cycles were then  
165 interpolated to ensure that each event had an equal number of samples (214) allowing for averaging across  
166 events.

167 For the naris occlusion experiment events were detected using the percentile method detailed above, except  
168 that a threshold value (in microvolts) was obtained from the baseline data and then applied to the ipsi-



169 and contralateral sessions; this was necessary to be able to compare the number of gamma events between  
170 conditions.

171 **Spectral analysis.** Session-wide PSDs were computed for the naris experiment using Welch's method ( $\sim 2$ s  
172 Hanning window) on the first derivative of the data to remove the overall  $1/f$  trend (MATLAB `pwelch(diff(data))`).  
173 Event-based gamma power was computed using the FieldTrip toolbox (Oostenveld et al., 2011) function  
174 `ft_freqanalysis('mtmfft', Hanning window, frequency of interest (FOI) 1-500Hz, window 5./FOI)`  
175 by averaging the frequencies of interest in the resulting PSD. Phase differences were computed relative to  
176 the ventrolateral most electrode using cross-power spectral density (MATLAB `cpsd`) using a 64 sample  
177 Hamming window with 50% overlap (NFFT = 1024).

178 **Plane fits.** To quantify the consistency of any patterns in the gamma power distribution across probe record-  
179 ing sites we computed a plane of best fit using least squares for the gamma power across the array during  
180 each gamma event and compared the variance explained ( $R^2$ ) to the pseudo-random non-gamma events of  
181 equivalent length.

182 **Current source density analysis.** Current source densities (CSD) were computed by taking the second spa-  
183 tial derivative of the bandpass filtered data across the recording channels along the dorsomedial to ventrolat-  
184 eral diagonal of the recording array and multiplying it by the conductance (0.3mS/mm). Missing channels  
185 along this diagonal were filled in by interpolation (MATLAB `griddata`). Average CSDs for each rat were  
186 computed using the three cycle triplet from each detected gamma event (mentioned above).

## 187 **Results**

### 188 **Experiment 1: mapping of gamma oscillations in the ventral striatum**

189 Clear gamma events were recorded across the vStr (Figure 1A) of all rats chronically implanted ( $n = 4$ ) with  
190 64-channel planar silicon probes, which covered an area of  $1.4\text{mm}^2$  with a regular  $8 \times 8$  grid of recording  
191 sites (Figure 1B and C). We recorded wideband neural data during behavior on an elevated maze and during  
192 off-task resting periods. As in previous reports, we found clear low- and high-gamma oscillations in the LFP  
193 (Figure 1A; Leung and Yim 1993; Berke et al. 2004; Howe et al. 2011) using probes implanted in the vStr,  
194 to which putative interneurons showed significant phase locking (Figure 1D). Gamma oscillations appeared  
195 highly coherent across sites, with visual inspection suggesting systematic changes in power across sites. To  
196 quantify this effect, we isolated gamma events using a thresholding procedure on the channel with the largest  
197 average gamma-band power (*Methods*); examples of detected events are shown as shaded areas in Figure 1A  
198 (low-gamma: blue, high-gamma, green). We plotted the gamma-band power across all probe sites as a heat  
199 map, illustrated for an example low-gamma event in Figure 2A and B. An approximately linear gradient  
200 was apparent, with the highest power at the ventrolateral pole and the lowest power at the dorsomedial pole  
201 (Figure 2B).

202 [Figure 1 about here.]

203 [Figure 2 about here.]

204 As a first step towards establishing the generality of this linear gamma power gradient, we detected low-  
205 gamma (45-65 Hz) and high-gamma (70-90 Hz) events across multiple recording sessions and subjects (11  
206 sessions across 4 subjects; total events detected, 5997 for low-gamma, 5005 for high-gamma; mean event  
207 rates 0.32/s for low-gamma, 0.32/s for high-gamma; mean  $\pm$  SD event length,  $140.89 \pm 59.52$  ms for low-

208 gamma,  $81.30 \pm 42.69$  ms for high-gamma). Although the distribution of functional sites varied between  
209 probes, the linear gamma power gradient was consistent across subjects (Figure 2C). Next, we asked if the  
210 distribution of gamma power across the vStr was affected by activity level (running on an elevated track  
211 for sucrose reward vs. off-task rest) or by different behaviors during the task (approaching reward sites vs.  
212 reward receipt and consumption). The observed gamma power gradient was highly consistent across all these  
213 conditions for both low- and high-gamma (Figure 3A). This systematic power gradient was further confirmed  
214 by plotting gamma power as a function of distance from the ventrolateral pole of the probe confirmed the  
215 systematic power gradient (Figure 4A and B).

216 [Figure 3 about here.]

217 To determine if this gradient was simply a consequence of probe impedance values or other peculiarities  
218 of the recording setup, we compared the power gradient obtained during detected gamma oscillation events  
219 to the power gradient from a set of randomly chosen control events. By fitting a plane to the distribution  
220 of power across the probe, we could quantify how much of the variance in power across probe sites was  
221 accounted for by a linear power gradient. If this gradient was due to nonspecific properties of the signal,  
222 then this pattern would be similar during true gamma oscillations and non-gamma events. Contrary to this  
223 scenario, the ventrolateral gradient disappeared for the random control events (Figure 3B, low-gamma events  
224 mean  $R^2$   $52.74 \pm 24.08$ , low-gamma matched random epochs mean  $R^2$   $22.79 \pm 20.94$ ; high-gamma events  
225 mean  $59.15 \pm 15.71$ , high-gamma matched random epochs mean  $18.51 \pm 18.11$ ; independent samples t-  
226 test:  $t_{(2690)} = 34.43$ ,  $p < 0.001$  for low-gamma;  $t_{(2308)} = 57.62$ ,  $p < 0.001$  for high-gamma). Furthermore,  
227 as reported previously (Berke et al., 2004), high-voltage spindles (HVS) displayed a power gradient in the  
228 opposite direction, with largest power at the dorsomedial pole (Figure 4C inset). Thus, the ventrolateral  
229 power gradient observed during gamma oscillations does not result from nonspecific probe or recording  
230 system properties.

231 [Figure 4 about here.]

232 The ventrolateral gamma power gradient identified above suggests the lack of a local source (in the vStr) for  
233 these oscillations. To determine the source of vStr gamma, we first plotted phase differences relative to the  
234 ventrolateral recording site. Although the specific pattern of these phase differences varied across subjects,  
235 these differences were consistently small ( $<10^\circ$ , Figure 5A); in particular, there was no evidence of phase  
236 reversals, a tell-tale sign of systematically arranged sink/source pairs. The patterns of phase differences were  
237 consistent between low- and high-gamma within subjects. Next, we applied current source density (CSD)  
238 analysis, which in accordance with the near-zero phase gradients showed only very small sink/source pairs,  
239 either in single examples (Figure 6A and B) or when averaged across all events (Figure 6C). Thus no it  
240 appears that no obvious source of either low- or high-gamma oscillations exists within the vStr.

241 [Figure 5 about here.]

242 [Figure 6 about here.]

### 243 **Unilateral naris occlusion strongly reduces vStr gamma power**

244 The clear gradient in vStr gamma power is consistent with Berke (2009)'s proposal that the adjacent piri-  
245 form cortex, known to generate strong gamma oscillations, may be the main source of vStr LFP gamma.  
246 Given that piriform gamma is known to be abolished by occlusion of the ipsilateral nostril (naris, Zibrowski  
247 and Vanderwolf 1997) we tested the effects of ipsilateral naris occlusions on vStr gamma power by insert-  
248 ing removable nose plugs alternately in one nostril, and then the other (*Methods*). Contralateral occlusions,  
249 performed alternately before or after the ipsilateral condition, provided a control for nonspecific (e.g. be-  
250 havioral) effects of naris blockage. Ipsilateral naris occlusions effectively abolished low- and high-gamma  
251 power relative to the contralateral condition, and relative to unoccluded conditions before (“pre”) or after  
252 (“post”, Figure 7A-C and H). Although power spectral densities of individual recording sessions varied,  
253 likely due to behavioral differences such as mobility on the pot, gamma suppression was highly consistent

254 across sessions and subjects (Figure 7A-C).

255 [Figure 7 about here.]

256 quantify this effect, we compared gamma power extracted from the power spectral density during ipsilateral  
257 and contralateral occlusions respectively, after normalizing to gamma power during non-occluded control  
258 conditions (“pre” and “post” recording epochs). Only ipsilateral occlusion significantly reduced gamma  
259 power in both low- and high-gamma bands to a mean of 0.48 (SEM  $\pm$  0.05) and 0.62 ( $\pm$  0.04) of the control  
260 condition. Paired t-tests confirmed the reduction was indeed significant for both low-gamma ( $t_{(11)} = -10.64$ ,  
261  $p < 0.001$ ) and high-gamma ( $t_{(11)} = -5.10$ ,  $p < 0.001$ ) relative to the power during the contralateral occlusion.  
262 The contralateral occlusion failed to reduce low-gamma power compared to the control ( $1.00 \pm 0.06$  of the  
263 control condition,  $t_{(11)} = 0.02$ ,  $p = 0.99$ ). Contralateral occlusion did produce a marked decrease in the high  
264 gamma power relative to the control ( $0.87 \pm 0.05$  of the control condition,  $t_{(11)} = -2.66$ ,  $p = 0.02$ ). Ipsilateral  
265 occlusion provided a significantly greater reduction in gamma power compared to contralateral occlusion for  
266 both low- ( $t_{(11)} = -11.62$ ,  $p < 0.001$ ) and high-gamma ( $t_{(11)} = -10.79$ ,  $p < 0.001$ ).

267 This strong reduction in gamma power could be due to fewer gamma events occurring, and/or events having  
268 lower gamma power. Gamma event detection applied to the occlusion conditions yielded a significantly  
269 lower number of gamma events in the ipsilateral occlusion recording (pre- and post session event count  
270 normalized to 1; low-gamma events,  $0.04 (\pm 0.21)$ ; high-gamma:  $0.13 (\pm 0.03)$ ) compared to the contralateral  
271 occlusion (low-gamma:  $1.09 \pm 0.19$ , paired t-test  $t_{(11)} = -5.73$ ,  $p < 0.001$ ; high-gamma:  $0.77 \pm 0.17$ ,  $t_{(11)}$   
272  $= -4.10$ ,  $p < 0.005$ , Figure 7D). The number of events in the ipsilateral occlusion was significantly lower  
273 than number of detected events in the unoccluded condition for low-gamma ( $t_{(11)} = -44.93$ ,  $p < 0.001$ ) and  
274 high-gamma ( $t_{(11)} = -29.59$ ,  $p < 0.001$ ). The contralateral occlusion did not differ compared to the control for  
275 low-gamma events ( $t_{(11)} = 0.47$ ,  $p = 0.69$ ), or high-gamma events ( $t_{(11)} = -1.41$ ,  $p = 0.19$ ). Further supporting  
276 the robustness of this result, the ipsilateral condition gamma power and gamma event count was lower than  
277 the contralateral condition gamma power in every individual session, without exception. Thus, ipsilateral

278 naris occlusion resulted in a strong reduction in gamma power which resulted in a reduction in the number  
279 of events detected.

## 280 **Discussion**

281 We have demonstrated that (1) the power of gamma oscillations in the ventral striatal local field potential  
282 increases along a clear dorsomedial-to-ventrolateral gradient, (2) the phases of gamma oscillations across the  
283 vStr are highly consistent, with no evidence of reversals indicating a local sink/source pair, and (3) gamma  
284 oscillations were strongly reduced by occlusion of the unilateral, but not contralateral, nostril. Together,  
285 these results strongly suggest that gamma oscillations in the vStr LFP are volume-conducted from piriform  
286 cortex, consistent with initial observations by Berke (2009), who reported highly similar LFPs in vStr and  
287 piriform. Here, we build on this initial work by providing systematic coverage of the vStr with high-density  
288 silicon probes, separately analyzing the low- and high-gamma bands and different behaviors, as well as  
289 providing a causal manipulation known to disrupt piriform gamma oscillations.

290 Establishing the source of vStr gamma oscillations is important for at least two distinct reasons. First, knowl-  
291 edge of the source directly informs the interpretation of recorded signals. Because vStr neurons can phase  
292 lock to gamma oscillations (Berke, 2009; Kalenscher et al., 2010; van der Meer et al., 2010; Howe et al.,  
293 2011; Dejean et al., 2016) and vStr ensemble spiking can predict gamma oscillation frequency (Catanese  
294 et al., 2016), the vStr LFP clearly contains at least some information about local (spiking) activity. However,  
295 if vStr LFPs contain a component volume-conducted from the piriform cortex, as we have shown, then some  
296 changes in the LFP may reflect processing in piriform cortex, rather than local processing in vStr. We expand  
297 on the issue of how to reconcile LFP volume conduction with local phase locking below.

298 The second reason it is important to identify the source(s) of the vStr LFP relates to how that signal is

299 controlled. Several studies have linked properties of the vStr LFP to different task components such as  
300 reward approach, receipt, and feedback processing (van der Meer and Redish, 2009; Cohen et al., 2009b),  
301 to trait-level variables such as impulsivity (Donnelly et al., 2014), translationally relevant interventions such  
302 as manipulations of the dopamine system (Berke, 2009; Lemaire et al., 2012; Morra et al., 2012) and deep  
303 brain stimulation (McCracken and Grace, 2009; Doucette et al., 2015). Our results imply that in order to  
304 change the vStr LFP, either endogenously or using experimental manipulations, it may paradoxically be more  
305 effective to target piriform cortex rather than the vStr itself.

306 The result that gamma-band LFP oscillations in vStr are primarily volume-conducted from a different struc-  
307 ture is in line with the biophysics of LFP generation, which generally require sink/source pairs of transmem-  
308 brane currents to be aligned so that their contributions may sum spatially to generate systematic changes in  
309 the LFP (Nunez and Srinivasan, 2006; Buzsáki and Wang, 2012). The striatum, as a non-layered structure  
310 with generally radially symmetric dendritic arbors (Kawaguchi et al. 1995; Tepper et al. 2004, 2010), lacks  
311 the organization conducive to spatial summing of currents. Nevertheless, there have been reports of local  
312 heterogeneity in vStr gamma oscillations. For instance, Kalenscher et al. (2010) and Morra et al. (2012)  
313 show example recordings for which specific channels show phases or amplitudes apparently inconsistent  
314 with volume conduction. When we found such examples in our data, however, they could be attributed to  
315 impedance magnitude or angle changes on isolated electrode sites; the high-density view afforded by Si  
316 probe recordings can disambiguate these cases. A different body of work has suggested that high-frequency  
317 oscillations can be generated locally in the vStr because they are affected by infusions of MK801 and lido-  
318 caine into the vStr (Hunt et al., 2010; Olszewski et al., 2013); however, given its anatomical proximity, it is  
319 conceivable that some of the drugs spread to act on the piriform cortex.

320 So, what is the correct interpretation of ventral striatal gamma oscillations in the LFP, given the apparent  
321 paradox of evidence for volume conduction on the one hand (as presented here, stylized in Figure 8A) and  
322 evidence for local phase locking and ensemble coding to gamma-band LFP on the other? We found no  
323 phase reversals that would indicate local generation of gamma oscillations in the LFP (Figure 8B), as could

324 be supported by cortical pyramidal-interneuron circuits as demonstrated in neocortical areas (Cardin et al.,  
325 2009; Sohal et al., 2009; Siegle et al., 2014), or by cell-intrinsic resonance (Taverna et al., 2007). A different  
326 possibility is that LFP oscillations result from local transmembrane currents, but are inherited from inputs  
327 to the vStr through the synaptic currents they generate (Figure 8A). As with the local generation scenario,  
328 our results seem to rule out this possibility, given that the distribution of gamma power across the vStr  
329 does not appear to match known anatomical distributions (Figure 8D; reviewed in Groenewegen et al. 1999;  
330 Humphries and Prescott 2010), and disappears with piriform inactivation. The vStr does receive inputs from  
331 piriform cortex, however (Brog et al., 1993; Schwabe et al., 2004), which could account for phase-locking  
332 in the vStr: to the extent that piriform cortex inputs are effective in driving vStr spiking, then that spiking  
333 would be expected to lock to the field potential originating in the same source structure (Figure 8C).

334 [Figure 8 about here.]

335 The above interpretation of vStr gamma oscillations has implications for a number of avenues of research  
336 involving the vStr. For instance, a long-standing notion is that vStr may provide a “switchboard” between  
337 inputs from prefrontal cortex, amygdala, and hippocampus (O’Donnell and Grace, 1995; Gruber et al., 2009);  
338 LFP oscillations are a major candidate for implementing and/or reflecting such functions (Fries, 2005, 2015).  
339 Our results suggest that vStr circuits are unlikely to contain the “controls” that determine the timing and  
340 frequency of vStr gamma oscillations. Instead, gamma oscillations volume-conducted and/or inherited from  
341 a common piriform source may be a powerful synchronizing drive of neural activity in the rodent limbic  
342 system. In particular, LFP synchrony in the gamma band across limbic structures such as prefrontal cortex,  
343 orbitofrontal cortex, ventral hippocampus, and amygdala (van Wingerden et al., 2014; Harris and Gordon,  
344 2015; Catanese et al., 2016), may, at least in rodents, be shaped by piriform input. Given the much larger  
345 distance from the human vStr to piriform cortex, and the widespread use of relatively local referencing in  
346 depth electrode recordings, it seems a priori unlikely that gamma oscillations in the human vStr are volume  
347 conducted from piriform cortex. More generally, however, there is at least some evidence that lateralized  
348 nasal breathing affects both the EEG signal and various aspects of cognitive performance (Block et al., 1989;



349 Zelano et al., 2016); intracranial EEG recordings in epilepsy patients show a connection between nasal  
350 breathing and increases in power of human delta (0.5-4 Hz), theta (4-8 Hz), and beta (13-34 Hz) oscillations  
351 in the piriform, amygdala and hippocampus. Although gamma activity has been linked to respiration in  
352 the olfactory circuit in rodents (Gault and Leaton, 1963), the time course of vStr gamma power rules out  
353 respiration as the only factor controlling gamma oscillations in the vStr LFP. For instance, several studies  
354 have noted strong suppression of gamma power as animals run, compared to rest (van der Meer and Redish,  
355 2009; Malhotra et al., 2015).

356 Our study has a number of limitations: we chose to focus on gamma-band oscillations for several reasons,  
357 including the high consistency with which these oscillations can be probed across multiple species (rodents  
358 and humans in particular), because it is the vStr oscillation band which has received the most attention  
359 in terms of behavioral correlates and relationship to spiking activity, and because gamma oscillations are  
360 plentiful during rest and well as during behavior. However, clearly it would be of interest to determine  
361 the sources of other oscillations in the vStr LFP, such as delta, theta and beta, which have all been linked  
362 to local spiking activity and behavior (Van der Meer and Redish, 2011; Howe et al., 2011; Stenner et al.,  
363 2015; Malhotra et al., 2015). The data we recorded as part of this study did not reliably contain clearly  
364 identifiable epochs with these oscillations, so this is an avenue for further work. Also, our naris occlusion  
365 procedure likely affects olfactory areas in addition to piriform cortex, such as the olfactory bulb and the  
366 olfactory tubercle (in rats: Zibrowski and Vanderwolf 1997); however, owing to its large size, convoluted  
367 shape and positioning at the ventral surface of the brain, piriform cortex is difficult to target with higher  
368 specificity. Centrifugal afferents from the entorhinal and piriform cortices and olfactory tubercle are capable  
369 of modulating olfactory bulb gamma even in the absence of the main peduncle input (Gray and Skinner,  
370 1988), yet we see a strong suppression of gamma power, suggesting that the entire circuit is sufficiently  
371 impaired. Despite this limitation, we point to the convergence between the naris occlusion experiment and  
372 the power gradient observed in the probe recordings to support the most parsimonious interpretation that  
373 gamma LFP oscillations in the vStr originate in piriform cortex.

374 In closing, we wish to stress an important point: the above conclusion that vStr gamma LFP oscillations  
375 are volume-conducted from piriform cortex does *not* mean oscillations in the vStr LFP are not important or  
376 an epiphenomenon. As pointed out earlier, the spiking of vStr neurons shows clear oscillatory signatures,  
377 including intrinsically generated resonance in the gamma range (Taverna et al., 2007). Indeed, given that  
378 pretty much any input to the vStr is known to have oscillatory activity at the LFP and spiking levels, it would  
379 be hard to imagine how vStr activity would not itself also show oscillations, which in turn can be used as  
380 an access point to define and manipulate specific functional sub-populations and state changes, as has been  
381 tremendously successful in other areas (Pesaran et al. 2002; Colgin et al. 2009; Bosman et al. 2012). Our  
382 results should motivate care in the interpretation of the vStr LFP, and suggest future work in determining  
383 how olfactory inputs may shape activity not just in the vStr but other limbic structures.

## 384 **References**

- 385 Akam, T. and Kullmann, D. M. (2010). Oscillations and filtering networks support flexible routing of information. *Neuron*,  
386 67(2):308–320.
- 387 Axmacher, N., Cohen, M. X., Fell, J., Haupt, S., Dümpelmann, M., Elger, C. E., Schlaepfer, T. E., Lenartz, D., Sturm, V., and  
388 Ranganath, C. (2010). Intracranial EEG Correlates of Expectancy and Memory Formation in the Human Hippocampus and  
389 Nucleus Accumbens. *Neuron*, 65(4):541–549.
- 390 Berke, J. D. (2004). Participation of Striatal Neurons in Large-Scale Oscillatory Networks. In *The Basal Ganglia VIII*, pages 25–36.  
391 Kluwer Academic Publishers, Boston.
- 392 Berke, J. D. (2009). Fast oscillations in cortical-striatal networks switch frequency following rewarding events and stimulant drugs.  
393 *European Journal of Neuroscience*, 30(5):848–859.
- 394 Berke, J. D., Okatan, M., Skurski, J., and Eichenbaum, H. B. (2004). Oscillatory entrainment of striatal neurons in freely moving  
395 rats. *Neuron*, 43(6):883–896.
- 396 Block, R. A., Arnott, D. P., Quigley, B., and Lynch, W. C. (1989). Unilateral nostril breathing influences lateralized cognitive  
397 performance. *Brain and Cognition*, 9(2):181–190.
- 398 Bosman, C. A., Schoffelen, J. M., Brunet, N., Oostenveld, R., Bastos, A. M., Womelsdorf, T., Rubehn, B., Stieglitz, T., De Weerd, P.,  
399 and Fries, P. (2012). Attentional Stimulus Selection through Selective Synchronization between Monkey Visual Areas. *Neuron*,  
400 75(5):875–888.

- 401 Brog, J. S., Salyapongse, A., Deutch, A. Y., and Zahm, D. S. (1993). The patterns of afferent innervation of the core and shell in the  
402 'accumbens' part of the rat ventral striatum: Immunohistochemical detection of retrogradely transported fluoro-gold. *Journal of*  
403 *Comparative Neurology*, 338(2):255–278.
- 404 Buzsáki, G. and Wang, X.-J. (2012). Mechanisms of Gamma Oscillations. *Annual review of neuroscience*, 35(March):203–225.
- 405 Cardin, J. A., Carlén, M., Meletis, K., Knoblich, U., Zhang, F., Deisseroth, K., Tsai, L.-H., and Moore, C. I. (2009). Driving  
406 fast-spiking cells induces gamma rhythm and controls sensory responses. *Nature*, 459(7247):663–7.
- 407 Catanese, J., Carmichael, J. E., and van der Meer, M. A. A. (2016). Low and high gamma oscillations deviate in opposite directions  
408 from zero-phase synchrony in the limbic corticostriatal loop. *Journal of Neurophysiology*, 116(March):jn.00914.2015.
- 409 Cohen, M. X., Axmacher, N., Lenartz, D., Elger, C. E., Sturm, V., and Schlaepfer, T. E. (2009a). Good vibrations: cross-frequency  
410 coupling in the human nucleus accumbens during reward processing. *Journal of Cognitive Neuroscience*, 21(5):875–889.
- 411 Cohen, M. X., Axmacher, N., Lenartz, D., Elger, C. E., Sturm, V., and Schlaepfer, T. E. (2009b). Nuclei Accumbens Phase  
412 Synchrony Predicts Decision-Making Reversals Following Negative Feedback. *Journal of Neuroscience*, 29(23):7591–7598.
- 413 Colgin, L. L., Denninger, T., Fyhn, M., Hafting, T., Bonnevie, T., Jensen, O., Moser, M.-B., and Moser, E. I. (2009). Frequency of  
414 gamma oscillations routes flow of information in the hippocampus. *Nature*, 462(7271):353–357.
- 415 Cummings, D. M., Henning, H. E., and Brunjes, P. C. (1997). Olfactory bulb recovery after early sensory deprivation. *The Journal*  
416 *of neuroscience : the official journal of the Society for Neuroscience*, 17(19):7433–7440.
- 417 Dejean, C., Boraud, T., and Le Moine, C. (2013). Opiate dependence induces network state shifts in the limbic system. *Neurobiology*  
418 *of Disease*, 59:220–229.
- 419 Dejean, C., Sitko, M., Girardeau, P., Bennabi, A., Caillé, S., Cador, M., Boraud, T., and Le Moine, C. (2016). Memories of Opiate  
420 Withdrawal Emotional States Correlate with Specific Gamma Oscillations in the Nucleus Accumbens. *Neuropsychopharmacol-*  
421 *ogy*.
- 422 Donnelly, N. A., Holtzman, T., Rich, P. D., Nevado-Holgado, A. J., Fernando, A. B. P., Van Dijck, G., Holzhammer, T., Paul, O.,  
423 Ruther, P., Paulsen, O., Robbins, T. W., and Dalley, J. W. (2014). Oscillatory activity in the medial prefrontal cortex and nucleus  
424 accumbens correlates with impulsivity and reward outcome. *PLoS ONE*, 9(10):e111300.
- 425 Doucette, W. T., Khokhar, J. Y., and Green, a. I. (2015). Nucleus accumbens deep brain stimulation in a rat model of binge eating.  
426 *Translational Psychiatry*, 5(12):e695.
- 427 Dürschmid, S., Zaehle, T., Kopitzki, K., Voges, J., Schmitt, F. C., Heinze, H.-J., Knight, R. T., and Hinrichs, H. (2013). Phase-  
428 amplitude cross-frequency coupling in the human nucleus accumbens tracks action monitoring during cognitive control. *Frontiers*  
429 *in Human Neuroscience*, 7:635.
- 430 Fries, P. (2005). A mechanism for cognitive dynamics: Neuronal communication through neuronal coherence. *Trends in Cognitive*  
431 *Sciences*, 9(10):474–480.
- 432 Fries, P. (2015). Rhythms for Cognition: Communication through Coherence. *Neuron*, 88(1):220–235.

- 433 Gault, F. P. and Leaton, R. N. (1963). Electrical activity of the olfactory system. *Electroencephalography and clinical neurophysi-*  
434 *ology*, 15(2):299–304.
- 435 Gray, C. M. and Skinner, J. E. (1988). Centrifugal regulation of neuronal activity in the olfactory bulb of the waking rabbit as  
436 revealed by reversible cryogenic blockade. *Experimental brain research*, 69(2):378–86.
- 437 Groenewegen, H. J., Wright, C. I., Beijer, A. V. J., and Voorn, P. (1999). Convergence and segregation of ventral striatal inputs and  
438 outputs. *Annals of the New York Academy of Sciences*, 877(1 ADVANCING FRO):49–63.
- 439 Gruber, A. J., Hussain, R. J., and O'Donnell, P. (2009). The nucleus accumbens: A switchboard for goal-directed behaviors. *PLoS*  
440 *ONE*, 4(4):e5062.
- 441 Haber, S. N. (2009). Anatomy and Connectivity of the Reward Circuit. In Dreher, J.-C. and Tremblay, L., editors, *Handbook of*  
442 *Reward and Decision Making*, pages 1–27. Academic Press.
- 443 Harris, A. Z. and Gordon, J. a. (2015). Long-Range Neural Synchrony in Behavior. *Annual review of neuroscience*, 38(March):171–  
444 194.
- 445 Hill, D. N., Mehta, S. B., and Kleinfeld, D. (2011). Quality metrics to accompany spike sorting of extracellular signals. *The Journal*  
446 *of neuroscience : the official journal of the Society for Neuroscience*, 31(24):8699–8705.
- 447 Howe, M. W., Atallah, H. E., McCool, a., Gibson, D. J., and Graybiel, a. M. (2011). Habit learning is associated with major shifts in  
448 frequencies of oscillatory activity and synchronized spike firing in striatum. *Proceedings of the National Academy of Sciences*,  
449 108(40):16801–16806.
- 450 Humphries, M. D. and Prescott, T. J. (2010). The ventral basal ganglia, a selection mechanism at the crossroads of space, strategy,  
451 and reward. *Progress in Neurobiology*, 90(4):385–417.
- 452 Hunt, M. J., Falinska, M., and Kasicki, S. (2010). Local injection of MK801 modifies oscillatory activity in the nucleus accumbens  
453 in awake rats. *Journal of psychopharmacology*, 24(6):931–941.
- 454 Kalenscher, T., Lansink, C. S., Lankelma, J. V., and Pennartz, C. M. A. (2010). Reward-Associated Gamma Oscillations in Ventral  
455 Striatum Are Regionally Differentiated and Modulate Local Firing Activity. *Journal of Neurophysiology*, 103(3):1658–1672.
- 456 Kawaguchi, Y., Wilson, C. J., Augood, S. J., and Emson, P. C. (1995). Striatal interneurons: chemical, physiological and morpho-  
457 logical characterization. *Trends in Neurosciences*, 18(12):527–535.
- 458 Kucharski, D. and Hall, W. G. (1987). New routes to early memories. *Science*, 238(4828):786–788.
- 459 Lemaire, N., Hernandez, L. F., Hu, D., Kubota, Y., Howe, M. W., and Graybiel, A. M. (2012). Effects of dopamine depletion on  
460 LFP oscillations in striatum are task- and learning-dependent and selectively reversed by l-DOPA. *Proceedings of the National*  
461 *Academy of Sciences*, 109(44):18126–18131.
- 462 Leung, L. S. and Yim, C. Y. C. (1993). Rhythmic delta-frequency activities in the nucleus accumbens of anesthetized and freely  
463 moving rats. *Canadian Journal of Physiology and Pharmacology*, 71(5-6):311–320.
- 464 Malhotra, S., Cross, R. W., Zhang, A., and Van Der Meer, M. A. A. (2015). Ventral striatal gamma oscillations are highly variable

465 from trial to trial, and are dominated by behavioural state, and only weakly influenced by outcome value. *European Journal of*  
466 *Neuroscience*, 42(10):2818–2832.

467 Masimore, B., Schmitzer-Torbert, N. C., Kakalios, J., and Redish, a. D. (2005). Transient striatal gamma local field potentials signal  
468 movement initiation in rats. *Neuroreport*, 16(18):2021–2024.

469 McCracken, C. B. and Grace, A. A. (2009). Nucleus accumbens deep brain stimulation produces region-specific alterations in local  
470 field potential oscillations and evoked responses in vivo. *J Neurosci*, 29(16):5354–5363.

471 Morra, J. T., Glick, S. D., and Cheer, J. F. (2012). Cannabinoid receptors mediate methamphetamine induction of high frequency  
472 gamma oscillations in the nucleus accumbens. *Neuropharmacology*, 63(4):565–574.

473 Nunez, P. L. and Srinivasan, R. (2006). *Electric Fields of the Brain: The Neurophysics of EEG, 2nd Edition: 9780195050387:*  
474 *Medicine & Health Science Books @ Amazon.com*. Oxford University Press.

475 O’Donnell, P. and Grace, A. a. (1995). Synaptic interactions among excitatory afferents to nucleus accumbens neurons: hippocampal  
476 gating of prefrontal cortical input. *The Journal of Neuroscience*, 15(5):3622–3639.

477 Olszewski, M., Dolowa, W., Matulewicz, P., Kasicki, S., and Hunt, M. J. (2013). NMDA receptor antagonist-enhanced high  
478 frequency oscillations: Are they generated broadly or regionally specific? *European Neuropsychopharmacology*, 23(12):1795–  
479 1805.

480 Oostenveld, R., Fries, P., Maris, E., and Schoffelen, J. M. (2011). FieldTrip: Open source software for advanced analysis of MEG,  
481 EEG, and invasive electrophysiological data. *Computational Intelligence and Neuroscience*, 2011.

482 Pennartz, C. M. A., Groenewegen, H. J., Lopes, F. H., and Silva, D. A. (1994). the Nucleus Accumbens As a Complex of F U N C  
483 T I O N a L L Y Distinct N E U R O N a L Ensembles : an I N T E G R A T I O N of Behavioural , Electrophysiological a N D  
484 Anatomical Data. *Progress in Neurobiology*, 42:719–761.

485 Pesaran, B., Pezaris, J. S., Sahani, M., Mitra, P. P., and Andersen, R. A. (2002). Temporal structure in neuronal activity during  
486 working memory in macaque parietal cortex. *Nature Neuroscience*, 5(8):805–811.

487 Schwabe, K., Ebert, U., and Löscher, W. (2004). The central piriform cortex: Anatomical connections and anticonvulsant effect of  
488 gaba elevation in the kindling model. *Neuroscience*, 126(3):727–741.

489 Sesack, S. R. and Grace, A. a. (2010). Cortico-Basal Ganglia reward network: microcircuitry. *Neuropsychopharmacology : official*  
490 *publication of the American College of Neuropsychopharmacology*, 35(1):27–47.

491 Siegle, J. H., Pritchett, D. L., and Moore, C. I. (2014). Gamma-range synchronization of fast-spiking interneurons can enhance  
492 detection of tactile stimuli. *Nature Neuroscience*, 17(August):1371–1379.

493 Sohal, V. S., Zhang, F., Yizhar, O., and Deisseroth, K. (2009). Parvalbumin neurons and gamma rhythms enhance cortical circuit  
494 performance. *Nature*, 459(7247):698–702.

495 Stenner, M.-P., Rutledge, R. B., Zaehle, T., Schmitt, F. C., Kopitzki, K., Kowski, A. B., Voges, J., Heinze, H.-J., and Dolan, R. J.  
496 (2015). No unified reward prediction error in local field potentials from the human nucleus accumbens: evidence from epilepsy  
497 patients. *Journal of neurophysiology*, page jn.00260.2015.

- 498 Sturm, V., Lenartz, D., Koulousakis, A., Treuer, H., Herholz, K., Klein, J. C., and Klosterkötter, J. (2003). The nucleus accumbens: A  
499 target for deep brain stimulation in obsessive-compulsive- and anxiety-disorders. *Journal of Chemical Neuroanatomy*, 26(4):293–  
500 299.
- 501 Taverna, S., Canciani, B., and Pennartz, C. M. A. (2007). Membrane properties and synaptic connectivity of fast-spiking interneu-  
502 rons in rat ventral striatum. *Brain Research*, 1152(1):49–56.
- 503 Tepper, J. M., Koós, T., and Wilson, C. J. (2004). GABAergic microcircuits in the neostriatum. *Trends in Neurosciences*, 27(11):662–  
504 669.
- 505 Tepper, J. M., Tecuapetla, F., Koós, T., and Ibáñez-Sandoval, O. (2010). Heterogeneity and diversity of striatal GABAergic interneu-  
506 rons. *Frontiers in neuroanatomy*, 4(December):150.
- 507 van der Meer, M. A. A., Kalenscher, T., Lansink, C. S., Pennartz, C. M. A., Berke, J. D., and Redish, A. D. (2010). Integrating early  
508 results on ventral striatal gamma oscillations in the rat. *Frontiers in Neuroscience*, 4(SEP):28.
- 509 van der Meer, M. A. A. and Redish, A. D. (2009). Low and high gamma oscillations in rat ventral striatum have distinct rela-  
510 tionships to behavior , reward , and spiking activity on a learned spatial deci- sion task. *Frontiers: A Journal of Women Studies*,  
511 3:9.
- 512 Van der Meer, M. A. A. and Redish, A. D. (2011). Ventral striatum: A critical look at models of learning and evaluation. *Current*  
513 *Opinion in Neurobiology*, 21(3):387–392.
- 514 van Wingerden, M., van der Meij, R., Kalenscher, T., Maris, E., and Pennartz, C. M. (2014). Phase-Amplitude Coupling in Rat  
515 Orbitofrontal Cortex Discriminates between Correct and Incorrect Decisions during Associative Learning. *J Neurosci*, 34(2):493–  
516 505.
- 517 Vandecasteele, M., M, S., Royer, S., Belluscio, M., Berényi, A., Diba, K., Fujisawa, S., Grosmark, A., Mao, D., Mizuseki, K., Patel,  
518 J., Stark, E., Sullivan, D., Watson, B., and Buzsáki, G. (2012). Large-scale recording of neurons by movable silicon probes in  
519 behaving rodents. *Journal of visualized experiments : JoVE*, N/A(61):e3568.
- 520 Vinck, M., Oostenveld, R., Van Wingerden, M., Battaglia, F., and Pennartz, C. M. A. (2011). An improved index of phase-  
521 synchronization for electrophysiological data in the presence of volume-conduction, noise and sample-size bias. *NeuroImage*,  
522 55(4):1548–1565.
- 523 Womelsdorf, T., Ardid, S., Everling, S., and Valiante, T. A. (2014). Burst Firing Synchronizes Prefrontal and Anterior Cingulate  
524 Cortex during Attentional Control. *Current Biology*, 24(22):2613–2621.
- 525 Zelano, C., Jiang, H., Zhou, G., Arora, N., Schuele, S., Rosenow, J., and Gottfried, J. A. (2016). Nasal Respiration Entrain Human  
526 Limbic Oscillations and Modulates Cognitive Function. *Journal of Neuroscience*, 36(49).
- 527 Zibrowski, E. M. and Vanderwolf, C. H. (1997). Oscillatory fast wave activity in the rat pyriform cortex: Relations to olfaction and  
528 behavior. *Brain Research*, 766(1-2):39–49.

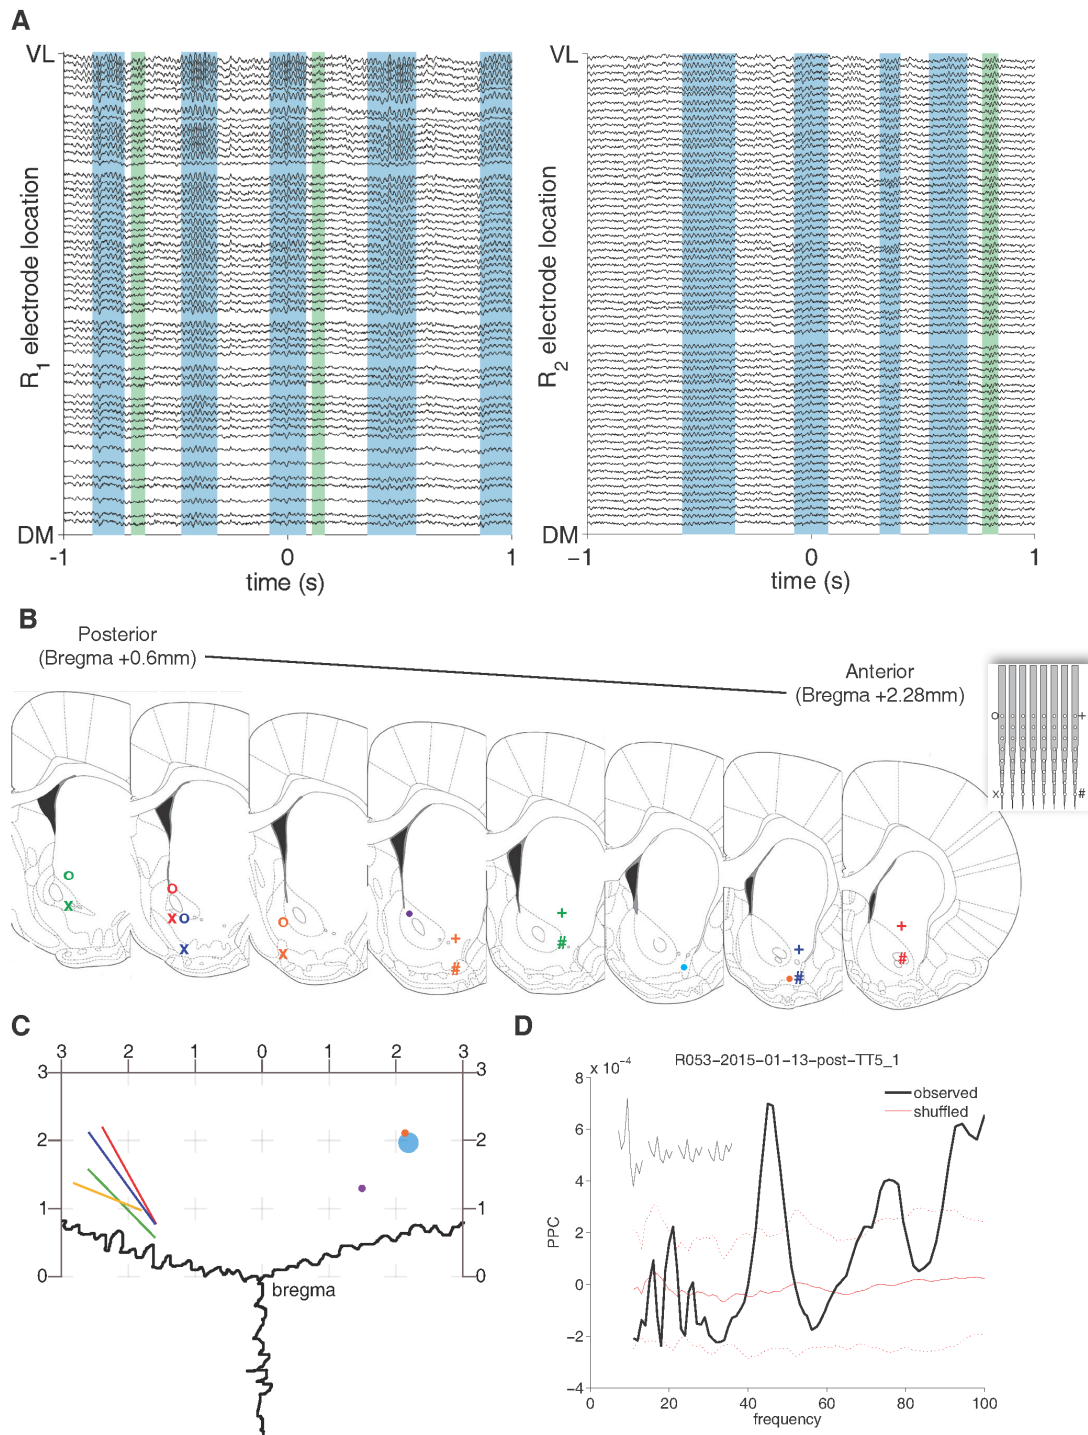

**Figure 1:** High-density planar silicon probe recordings across the ventral striatum. **A:** Example ventral striatum LFP traces (filtered between 1-500 Hz; the two sets are from different subjects R1 and R2) ordered by the location of the corresponding electrode site along the ventrolateral (VL, top) to dorsomedial (DM, bottom) axis of the probe. Gamma events were detected using a thresholding procedure; example low-gamma events are shaded in blue, high-gamma events in green. Note that the amplitude of the gamma events increases from the dorsomedial to ventrolateral electrodes. **B:** Recording locations as determined by histological processing. For silicon probes (inset), recording locations are indicated by the corners of the probe (o+x#), while tetrode locations are marked with dots (colored by subject). **C:** Dorsal view of the electrode locations to demonstrate the angle of the probes (lines), and location of tetrodes (dots) all colored by subject. **D:** Field pairwise phase consistency (PPC, Vinck et al. 2011) of a representative ventral striatal unit showing a clear peak in the gamma band.

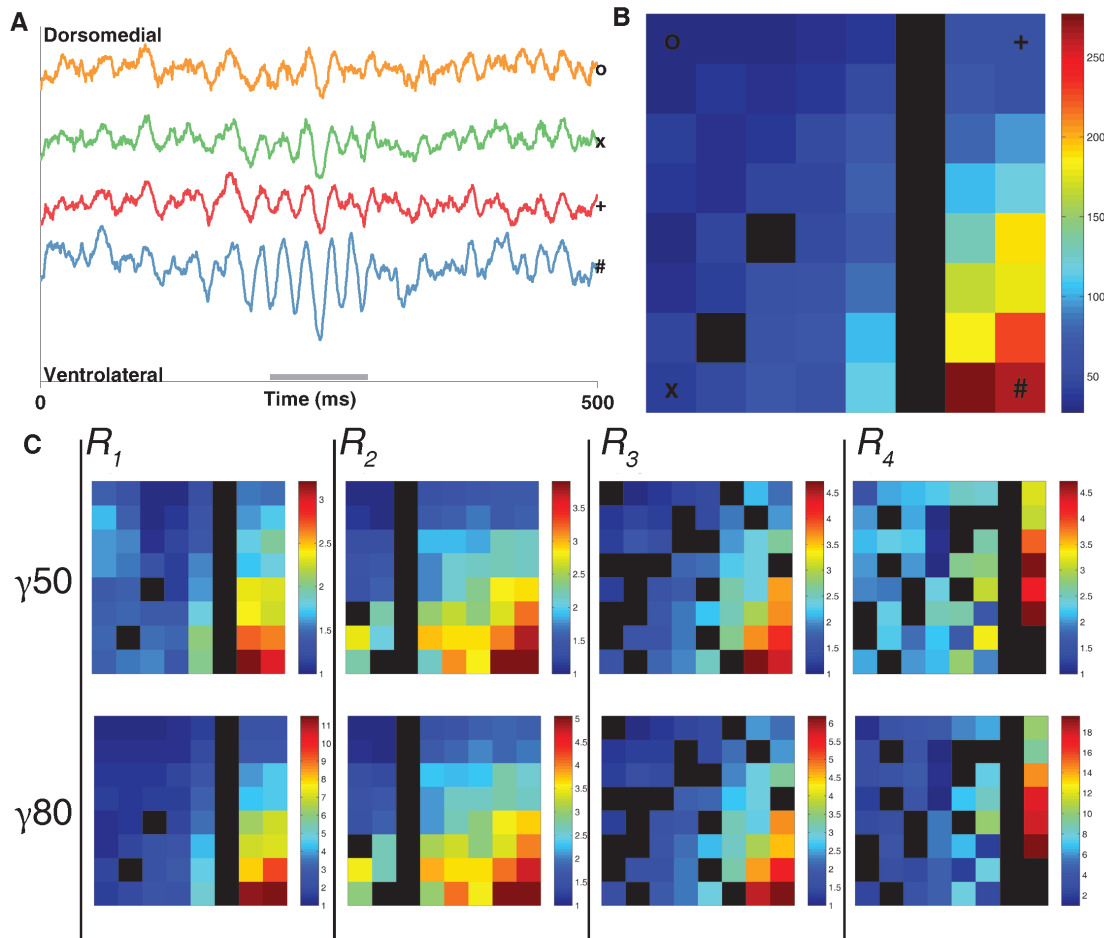

**Figure 2:** Gamma band local field potential (LFP) oscillations in the ventral striatum form a dorso-medial to ventrolateral power gradient. **A:** Raw LFP traces (left) from the recording electrodes at the dorsomedial (o), ventromedial (x), dorsolateral (\*) and ventrolateral (#) points of the silicon probe for a representative low-gamma event. Grey bar spans the length of the gamma event (see *Methods* for details of gamma detection). **B:** Heat map (right) showing the gamma power ( $\mu V^2$ ) across the recording array (64 sites, regularly spaced in an 8x8 grid spanning 1.4mm<sup>2</sup>) during the same low-gamma event as seen in the raw traces (left). Gamma power is about five times greater in the ventrolateral region compared to the dorsal-medial region. **C:** Average low- and high-gamma power across an entire recording session for each subject using the same probe layout in similar recording locations across animals (scale is normalized to the lowest power channel). Black spaces represent defective recording sites (see *Methods* for defective site criteria).



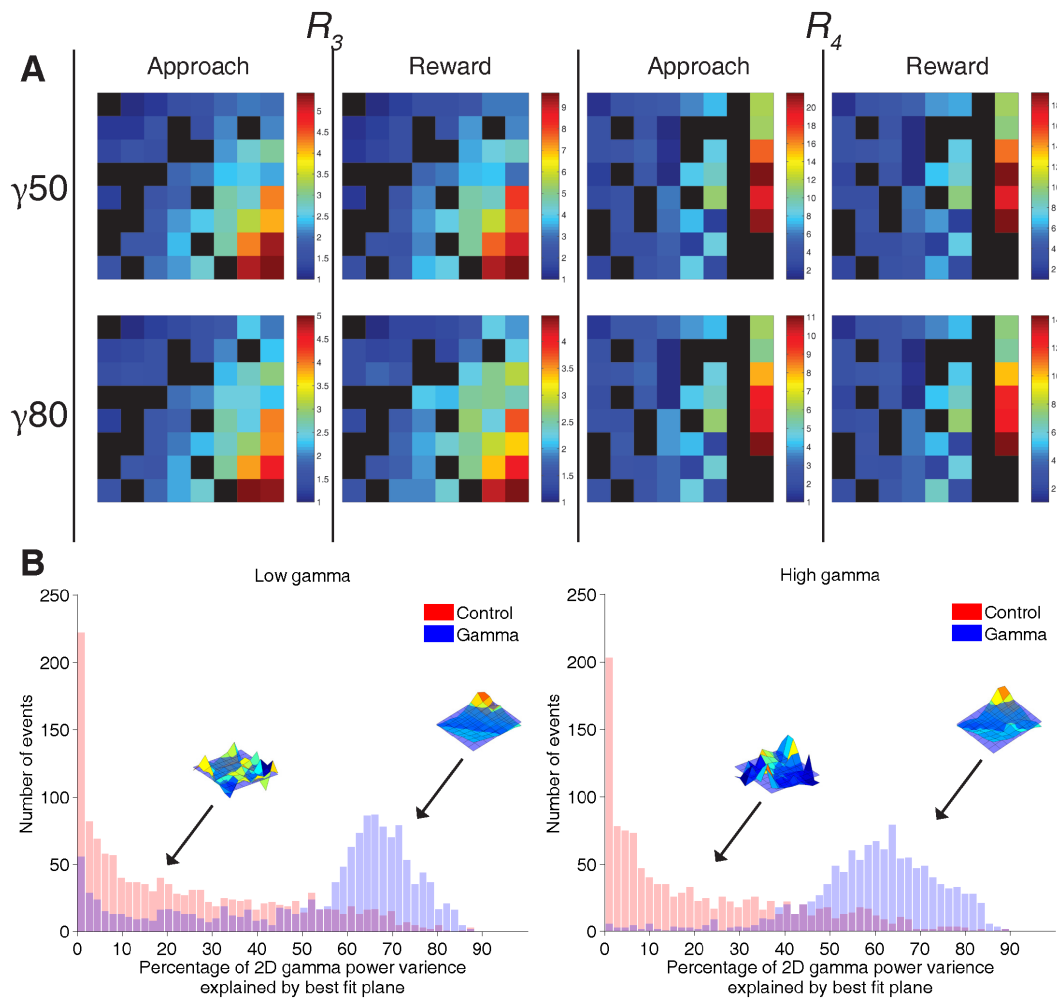

**Figure 3:** The vStr dorsomedial to ventrolateral gamma power gradient is conserved across different behaviors and is significantly different from randomly selected epochs. **A:** Average gamma power distributions across vStr during active foraging and reward consumption for two subjects that completed the foraging task. **B:** Histograms of variance explained ( $R^2$ ) for plane fits to low-gamma (left) and high-gamma (right) and shuffled events of equivalent length (red). Gamma event  $R^2$  values form a tight cluster with the majority of the variance explained by the best fit plane, while random events fail to fit the plane. Insets are representative gamma and shuffled events.

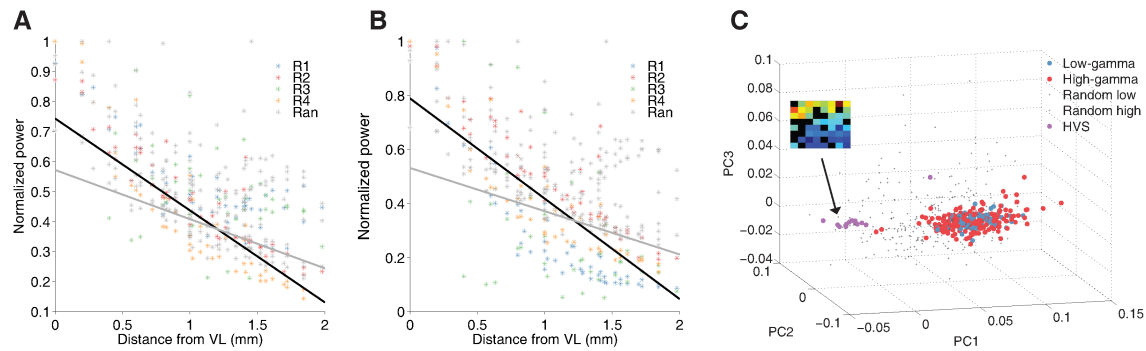

**Figure 4:** Gamma events form a consistent dorsomedial to ventrolateral power gradient that can be separated from high voltage spindles and random epochs. Random epochs were duration matched periods of low gamma power (see *Methods* for details). **A:** Gamma power relative to distance from the ventrolateral most site on the probe. Average gamma power from each recording session (points) separated by subject (colors) normalized to the maximum value for both low (**A**) and high (**B**). **C:** PCA on the power gradients across events reveals that both low-gamma and high-gamma are indistinguishable from each other, yet are clearly separate from both random epochs and high-voltage-spindles.

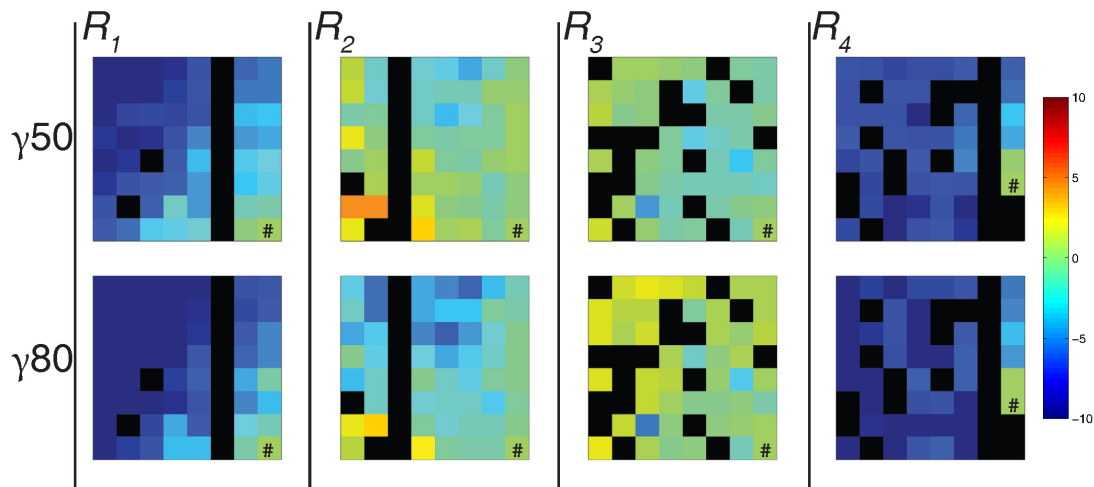

**Figure 5:** Average phase differences across the center three cycles in each event. Phase lags were found to have a gradient along the ventrolateral to dorsomedial poles, but lacked directional consistency. Each plot shows the average phase difference (in degrees) relative to the ventrolateral most electrode (#). Phase differences were negligible showing a small lag from ventrolateral to dorsomedial in 2/4 subjects. Heat maps range between -10 to 10 degrees ( $\pm 0.6$ ms)

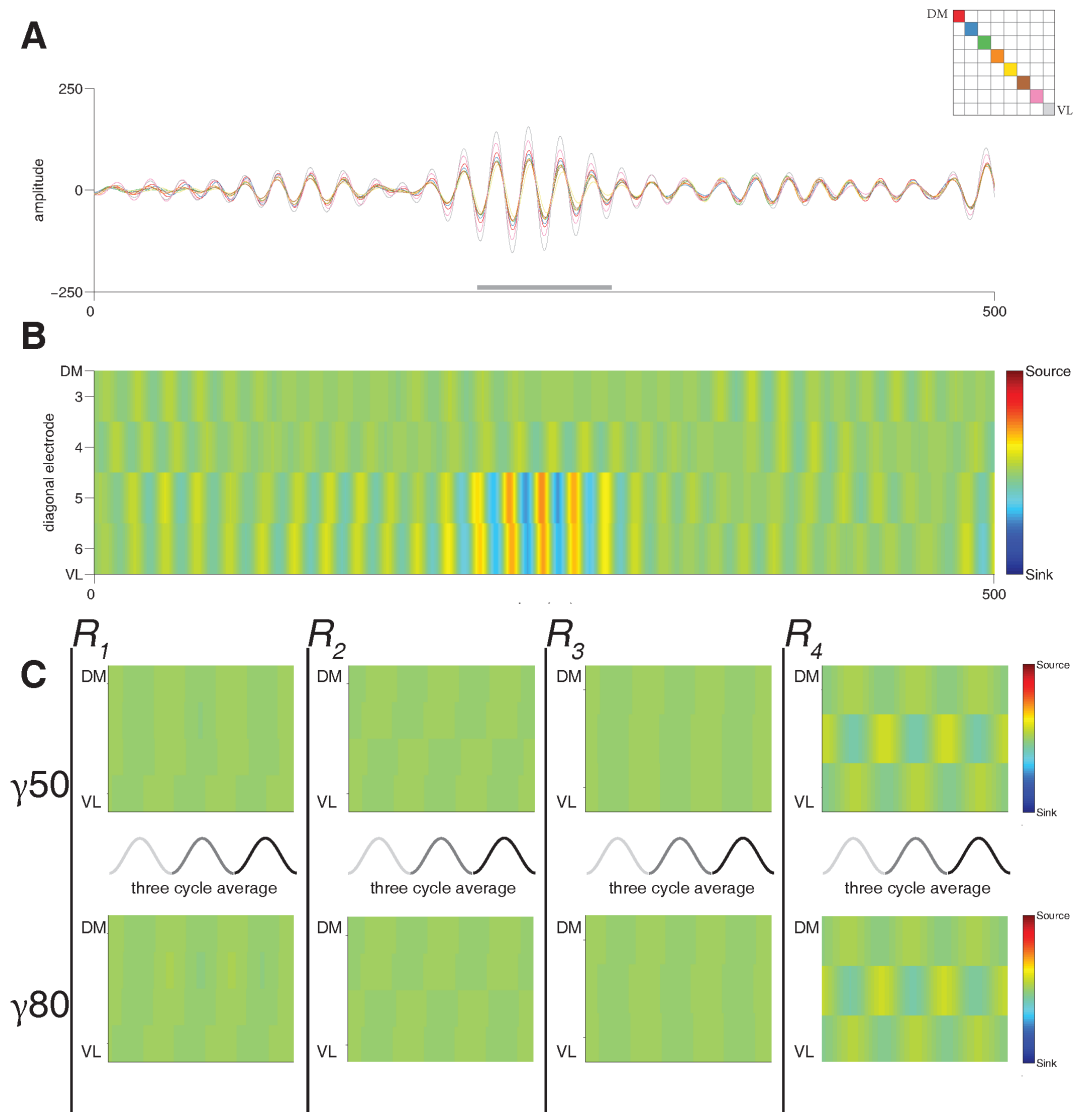

**Figure 6:** Current source density (CSD) analysis of gamma events. **A:** Filtered low-gamma event (same as shown in Figure 2B). Each trace represents a recording site on the diagonal of the silicon probe (inset), note the change in power along the dorsomedial to ventrolateral axis but very similar phases. **B:** Sample CSD over the same low-gamma event. Pseudocolor scale represents fractional values relative to a  $180^\circ$  phase inversion (source/sink pair). Only a weak source/sink appears on the ventrolateral pole across electrodes, corresponding to the slight phase shift in the example traces. **C:** Average CSD across the center three cycles (grey lines) by subject event. Note that no clear source/sink pair emerges, consistent with the lack of a phase reversal in the gamma-band LFP.

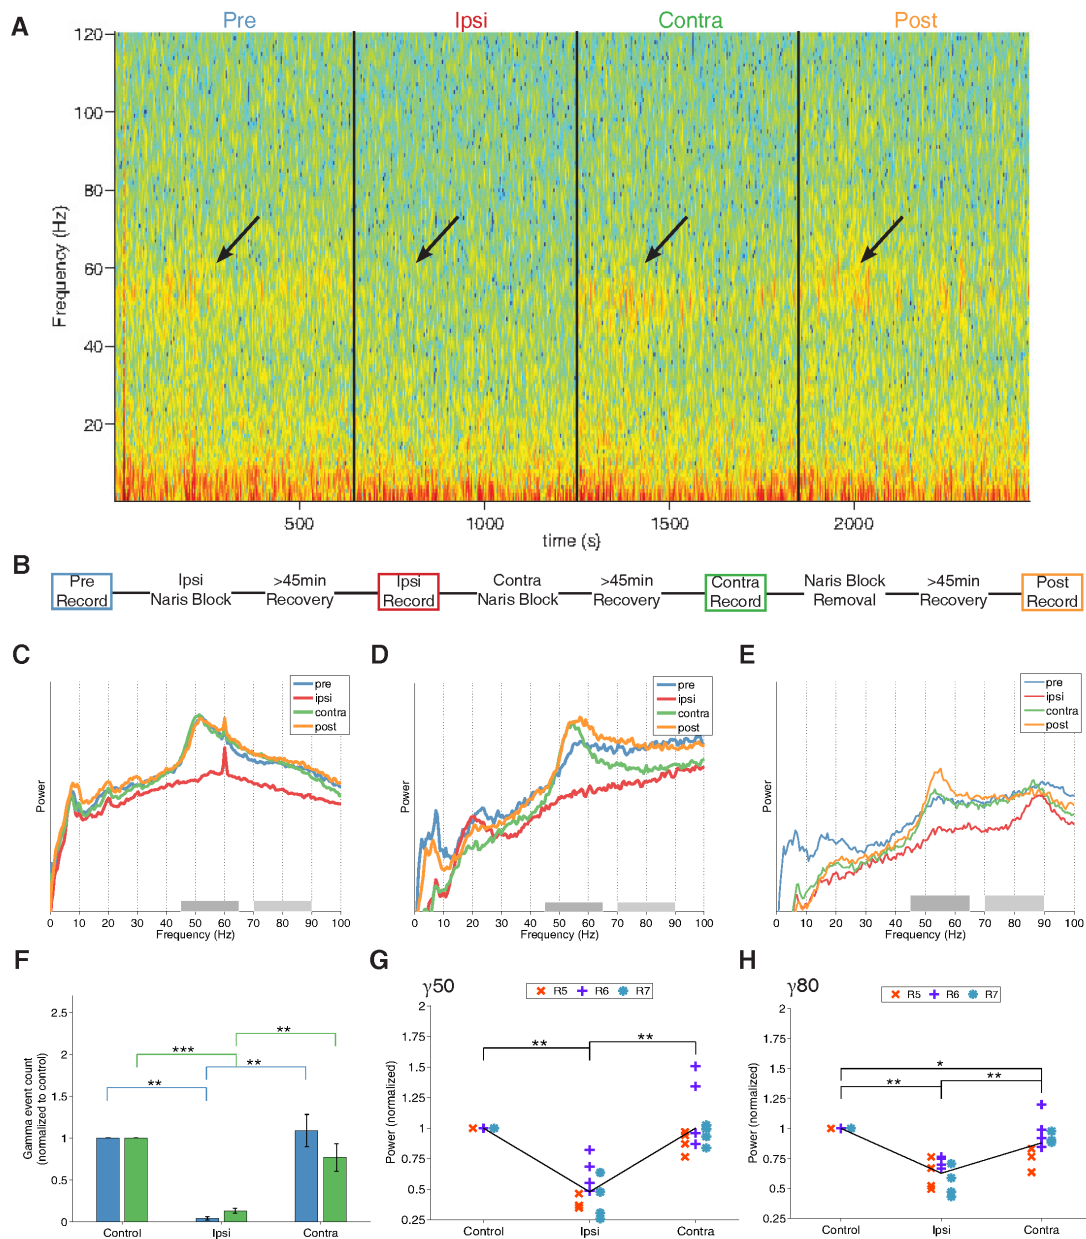

**Figure 7:** Ipsilateral, but not contralateral, naris occlusion reduces gamma power and event occurrence in the vStr. **A:** Spectrogram across all four experimental phases in a single session. Arrows emphasize the clear gamma band power that disappears during the ipsilateral phase. **B:** Naris experiment timeline. Ipsi- and contralateral occlusion order was counterbalanced across days. **C-E:** Normalized power spectral densities (PSDs) of representative sessions from each rat (R5,6, and 7 respectively). Each session shows a clear reduction in power within the gamma bands for the ipsilateral occlusion condition only (red line). Note that although PSDs differed between sessions (e.g. high-voltage spindles, 7-11 Hz, in the “post” condition in **D**), the reduction in gamma power was highly consistent. PSDs were computed on the first order derivative of the data to remove the 1/f distributions. **F:** Comparison of the average number of detected gamma events per condition normalized to the unoccluded condition. The ipsilateral condition yielded significantly fewer events for the same recording duration (see main text).<sup>29</sup> Contralateral occlusion increased the number of high-gamma events. Errorbars represent SEM. **G-H:** Comparison of the average power in each session/subject (R4-7) within the low-gamma/high-gamma band. Ipsi- and contralateral conditions were normalized to the unoccluded condition (average between pre and post).

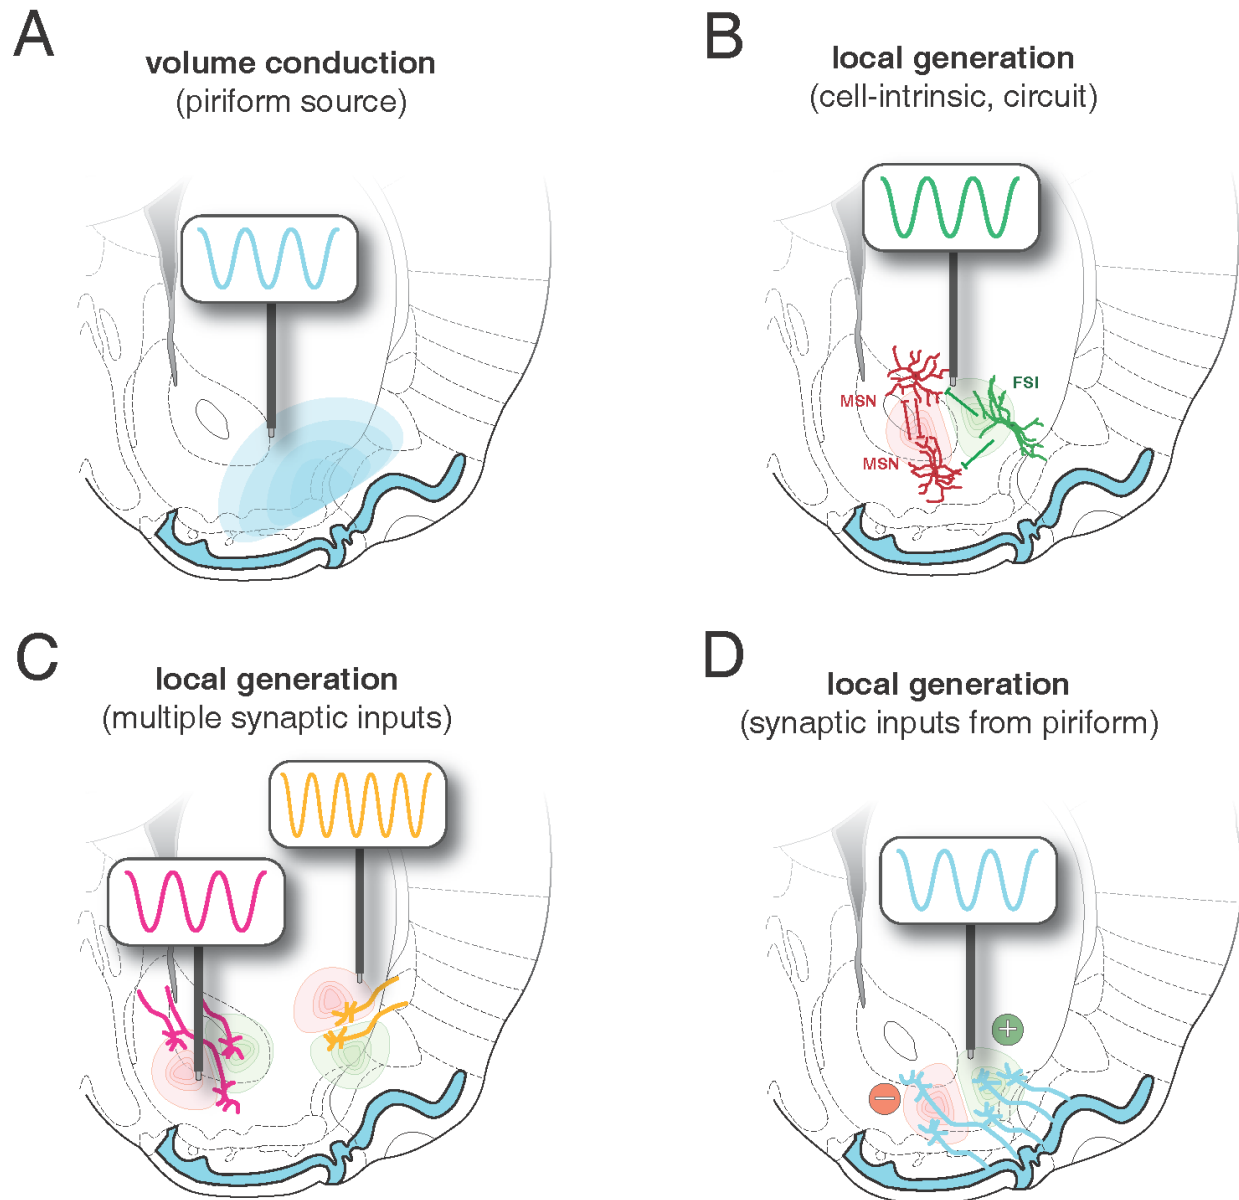

**Figure 8:** Four possible scenarios for the generation of gamma-band oscillations in the vStr. **A:** Volume conduction originating in the adjacent piriform cortex would show no clear phase reversals within the vStr. **B:** Local mechanisms such as cell-intrinsic currents and circuitry produce local gamma oscillations within the vStr circuit. **C:** Local sources matching the anatomical heterogeneity of the vStr, here idealized with two different afferent sources (orange and magenta). **D:** Rhythmic inputs from the adjacent piriform cortex lead to local generation within the vStr, which should follow anatomical projection densities. Our data did not show phase reversals within the vStr ruling out local generation by cell-intrinsic or multiple synaptic inputs. Inactivation of the piriform cortex greatly reduced gamma oscillations across the vStr making volume conduction the most plausible source of vStr gamma oscillations in the LFP, but does not rule out inherited inputs from the piriform, though a lack of phase reversals makes this unlikely.
